# Supplementary material for: Domain 2 of Hepatitis C Virus Protein NS5A Activates Glucokinase and Induces Lipogenesis in Hepatocytes
Source: MDPI journal article supplement (doi:10.3390/ijms23020919), 2022-01-14

Figure S1: Analysis of NS5A-D2 expression in transduced Huh7-*GCK<sup>+</sup>/HK2<sup>-</sup>* cells

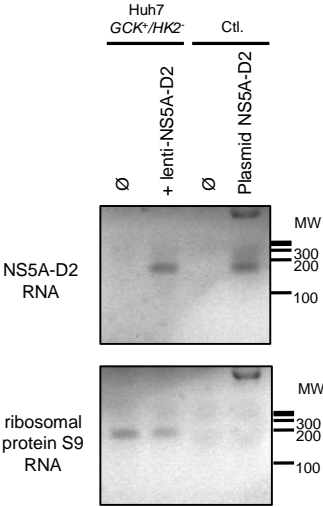

Figure S2: ECAR and OCR quantification during Glycolytic Rate Test performed at 5 and 25mM glucose, on Huh7-*GCK*<sup>+</sup>/*HK2*<sup>-</sup> cells expressing or not NS5A-D2.

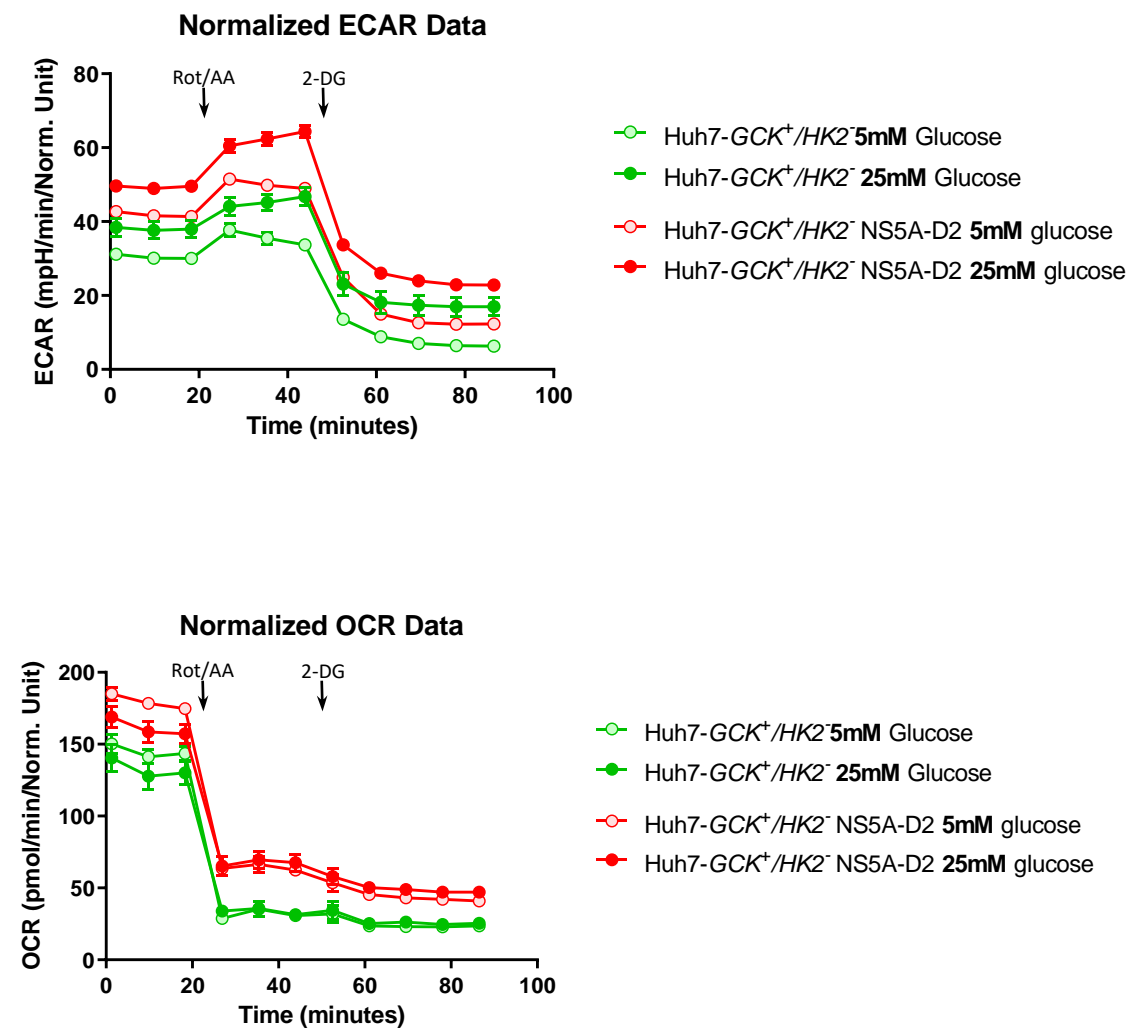

Figure S3: NS5A-D2 alters allosteric properties of GCK enzyme

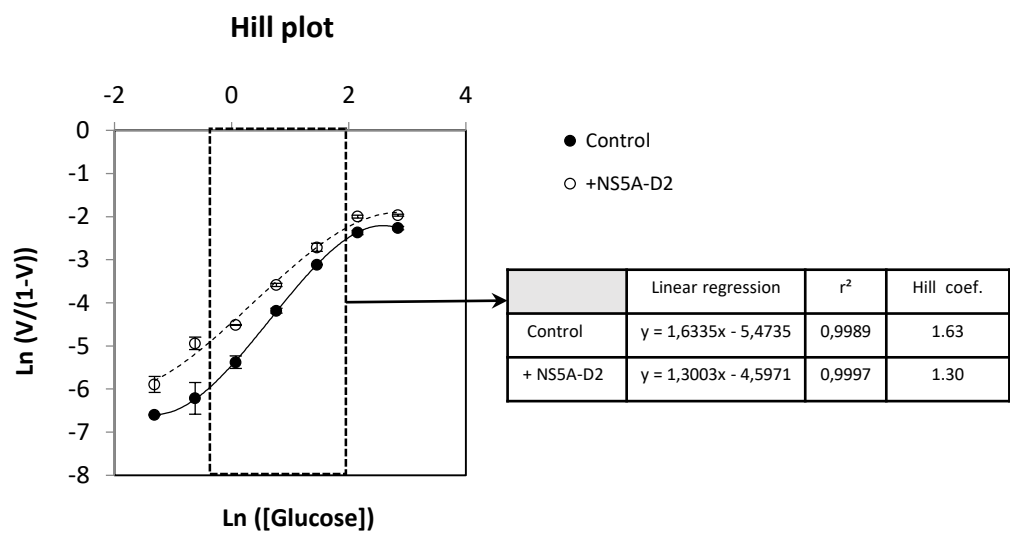

Figure S4: Western-blot Figure 1A

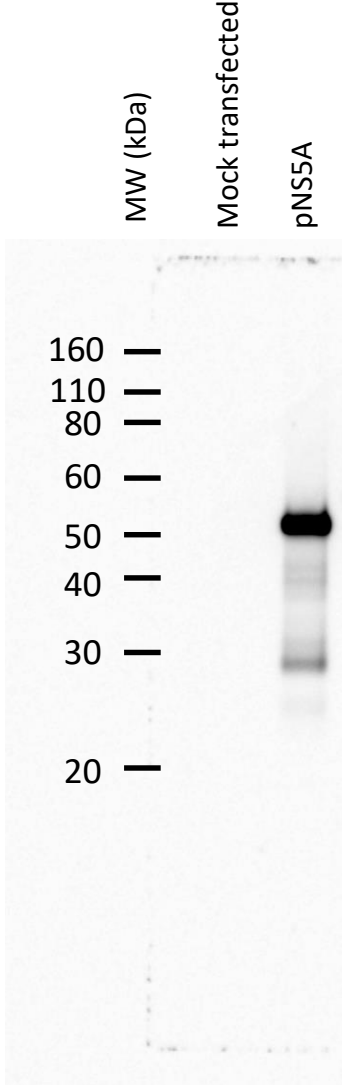

Figure S5: Western-blot Figure 4A

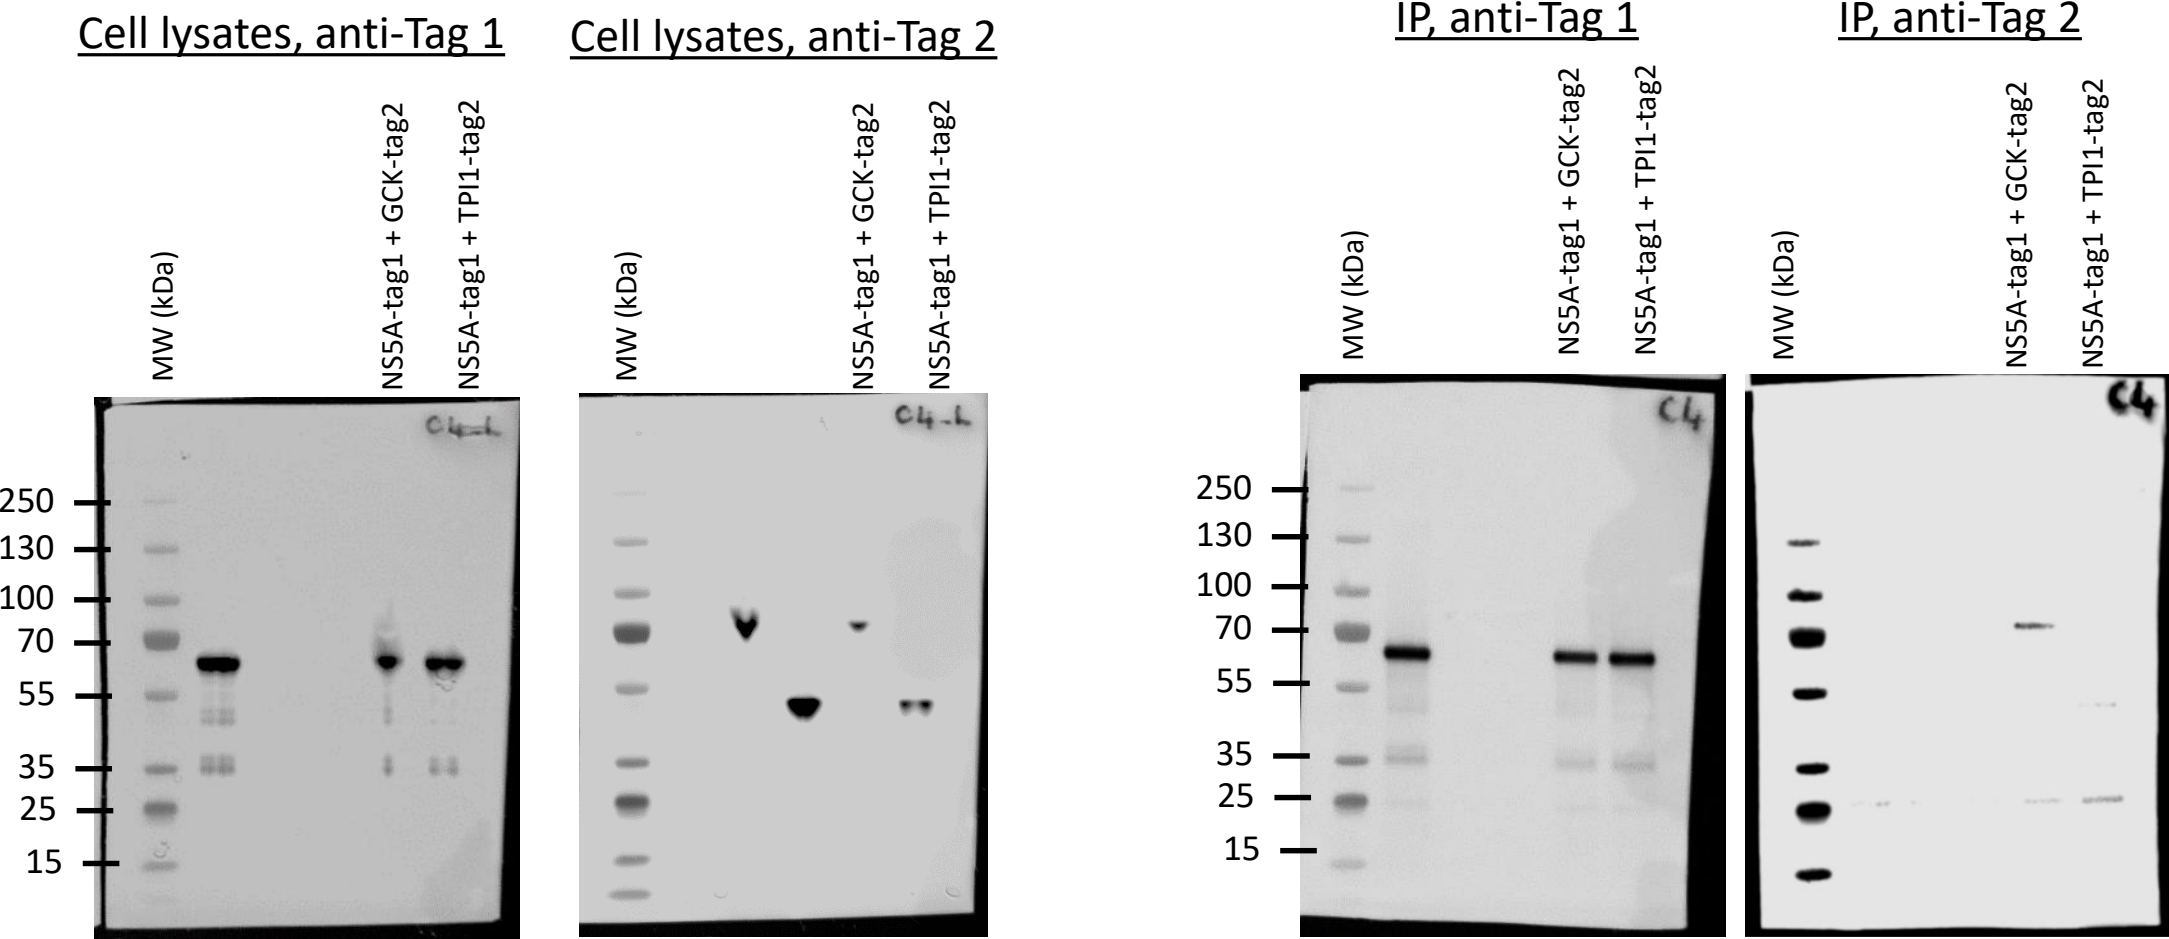

Supplement: s1 [file s1]
